# Supplementary material
Source: PubMed Central journal article supplement (PMC3155957)
Supplement: NIHMS305207-supplement-1.pdf [file NIHMS305207-supplement-1.pdf]

## Supplemental File

**Supplemental Table 1. Primers used in the study**

| <b>Primer name</b>  | <b>Sequence (5'→3')</b>         | <b>Use</b>    |
|---------------------|---------------------------------|---------------|
| Foxp3-1-F           | tgg tac agt ctc tgg agc ag      | Real time PCR |
| Foxp3-1-R           | agg atg gcc cag cgg atg ag      | Real time PCR |
| beta-actin-F        | atg ttt gag acc ttc aac ac      | Real time PCR |
| beta-actin-R        | cac gtc aca ctt cat gat gg      | Real time PCR |
| CCR6-F              | gat tcc tca taa cat ggt cct gc  | Real time PCR |
| CCR6-R              | ata gtg aag gac gac gca ttg tc  | Real time PCR |
| AHR-F               | cat acc cca cta ctt cta gtt tag | Real time PCR |
| AHR-R               | agg aat cca ctg gat gtc aaa tca | Real time PCR |
| IL-22-F             | caa cac aga cgt tgc tct cat tg  | Real time PCR |
| IL-22-R             | cag gca ttt ctc aga gac ata aac | Real time PCR |
| IL-21-F             | ttc tgc cag ctc cag aag atg     | Real time PCR |
| IL-21-R             | cac ttc cgt gtg ttc tag agg     | Real time PCR |
| IL-17F-F            | cag gag gta gta tga agc ttg ac  | Real time PCR |
| IL-17F-R            | atg gtg gat gac agg ggt g       | Real time PCR |
| IL-17A-F            | gac tgt gat ggt caa cct gaa c   | Real time PCR |
| IL-17A-R            | aca atc ggg gtg aca cag gt      | Real time PCR |
| IL-23R-F            | gac tca gga aat aat ccc agg t   | Real time PCR |
| IL-23R-R            | tcc aag agt gaa atc cta ttg aag | Real time PCR |
| STAT3-F             | gtc tcc act ggt cta tct cta t   | Real time PCR |
| STAT3-R             | gta gcg cac tcc gag gtc a       | Real time PCR |
| RORC-F              | ttt tcc gag gat gag att gc      | Real time PCR |
| RORC-R              | ctt tcc aca tgc tgg cta ca      | Real time PCR |
| IL-6R-F             | tgg tgc agc ttc gtg ccc a       | Real time PCR |
| IL-6R (variant 1)-R | ccc gca gct tcc acg tct t       | Real time PCR |
| IL-6R (variant 2)-R | gag tac ggc gga tgc atg c       | Real time PCR |
| SOCS1-F             | cga caa tgc agt ctc cac ag      | Real time PCR |
| SOCS1-R             | agg cca tct tca cgc taa gg      | Real time PCR |
| SOCS2-F             | aag agg cac cag aag gaa ctt     | Real time PCR |
| SOCS2-R             | tac aga gat gct gca gag atg     | Real time PCR |
| SOCS3-F             | ttc gac tgc gtg ctc aag ct      | Real time PCR |
| SOCS3-R             | cat cgt act ggt cca gga ac      | Real time PCR |
| OAS1-F              | caa ctc tgc atc tac tgg aca     | Real time PCR |

|            |                               |               |
|------------|-------------------------------|---------------|
| OAS1-R     | gca ctg gca ttc aga gga tg    | Real time PCR |
| GFI1-F     | cag gaa cgg agc ttt gac tg    | Real time PCR |
| GFI1-R     | cct tcg gag gtc cac ctt c     | Real time PCR |
| CCL5-F     | cag gaa cgg agc ttt gac tg    | Real time PCR |
| CCL5-R     | tct cca aag agt tga tgt act c | Real time PCR |
| EBI3-F     | cgt.gca.cct.gtt.ctc.cac.g     | Real time PCR |
| EBI3-R     | ggc.tcc.agt.cac.ttg.gtt.tc    | Real time PCR |
| LZTFL1-F   | tac agg cta caa atg cac tgg   | Real time PCR |
| LZTFL1-R   | tcc tca gat ctt tga ttt ggt c | Real time PCR |
| IFIT3-F    | gac act gct gtg caa cat gg    | Real time PCR |
| IFIT3-R    | agt tgc tct gag tta gag agg   | Real time PCR |
| TNFSF13B-F | tct tac aca ttt gtt cca tgg c | Real time PCR |
| TNFSF13B-R | atg tga cat ctc cat cca gtg   | Real time PCR |
| HIC1-F     | acg gca agg gca agc tcg a     | Real time PCR |
| HIC-R      | agc acc tcg gcc gcc ttg       | Real time PCR |
| METTL7A-F  | aac atg cac cag gtg gct ga    | Real time PCR |
| METTL7A-R  | cca act ccc agg aca gtg g     | Real time PCR |
| ASB2-F     | agc gtg gtg cag ttc tgt ga    | Real time PCR |
| ASB2-R     | cag gta tct aat cag cct gc    | Real time PCR |
| CD38-F     | gca gaa gct gcc tgt gat gtg   | Real time PCR |
| CD38-R     | cag atg tgc aag atg aat cct c | Real time PCR |

## Supplemental Figures

**Fig. 1. Genes that are regulated by P4 in CB T cells.** CB and PB naïve T cells, cultured in the presence or absence of P4 and/or TGF $\beta$ 1 for 5 days, were compared for global gene expression. Two sets of the experiments were compared for identification of genes that were reproducibly induced or suppressed. (A) Multi-plots with highlighted genes reproducibly up or down-regulated in response to P4 in the presence or absence of TGF $\beta$ 1. (B) Treeviews of gene groups up- or down-regulated by P4 in T cells. Group A and B display genes down-regulated by P4 primarily in PB and CB respectively. Group C has genes up-regulated by P4 in both. Group D1 and D2 display genes that are up-regulated primarily in CB. Two sets of data in five gene groups are shown. (C) A real time RT-PCR assay on CB T cells was performed for the selected genes. The data are representative of 2-3 independent experiments. Relative expression values after normalized with  $\beta$ -actin levels are shown. The error bars are differences of duplicated measurements.

A

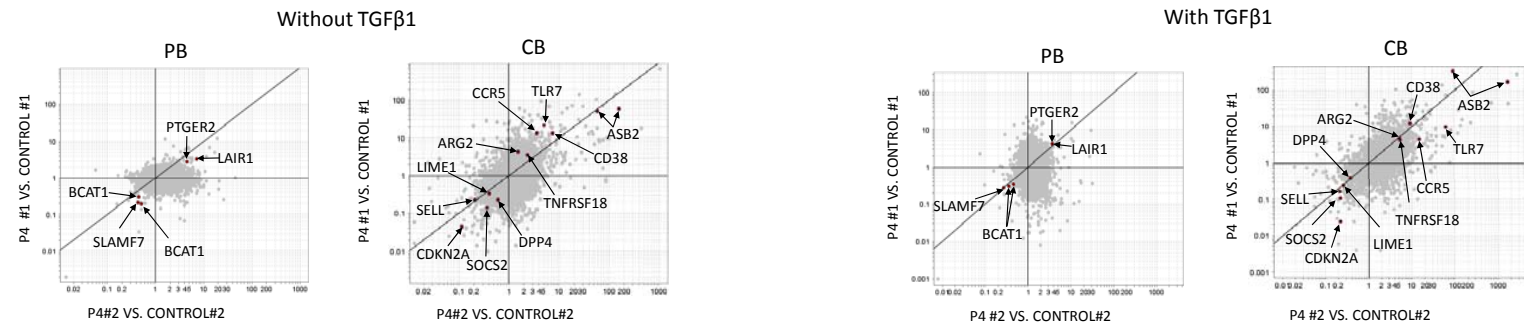

B

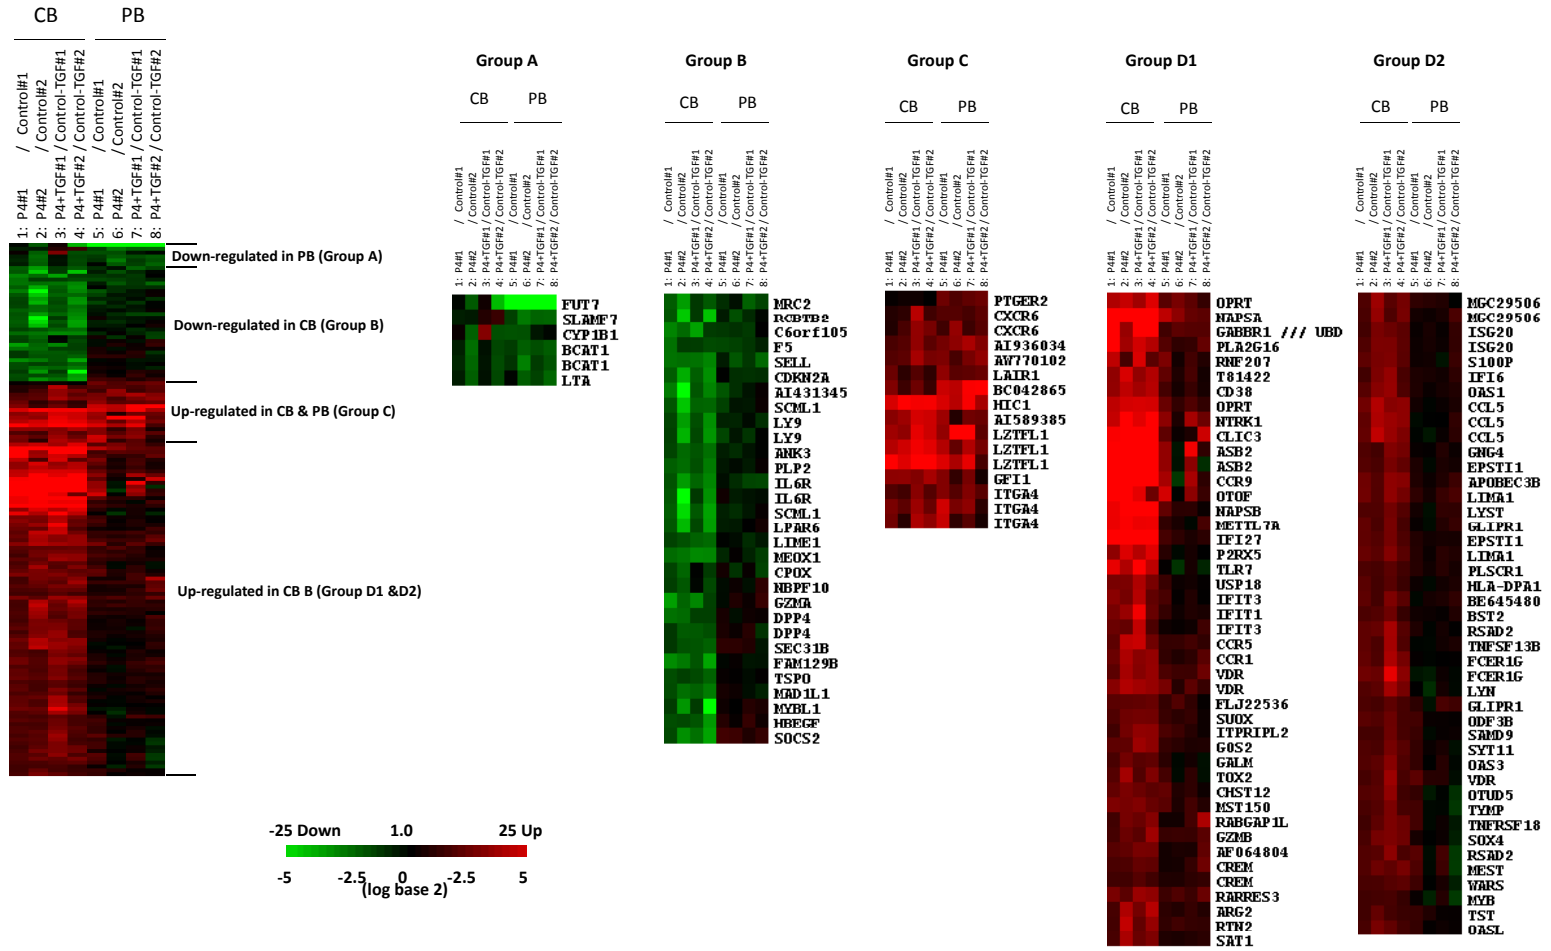

C

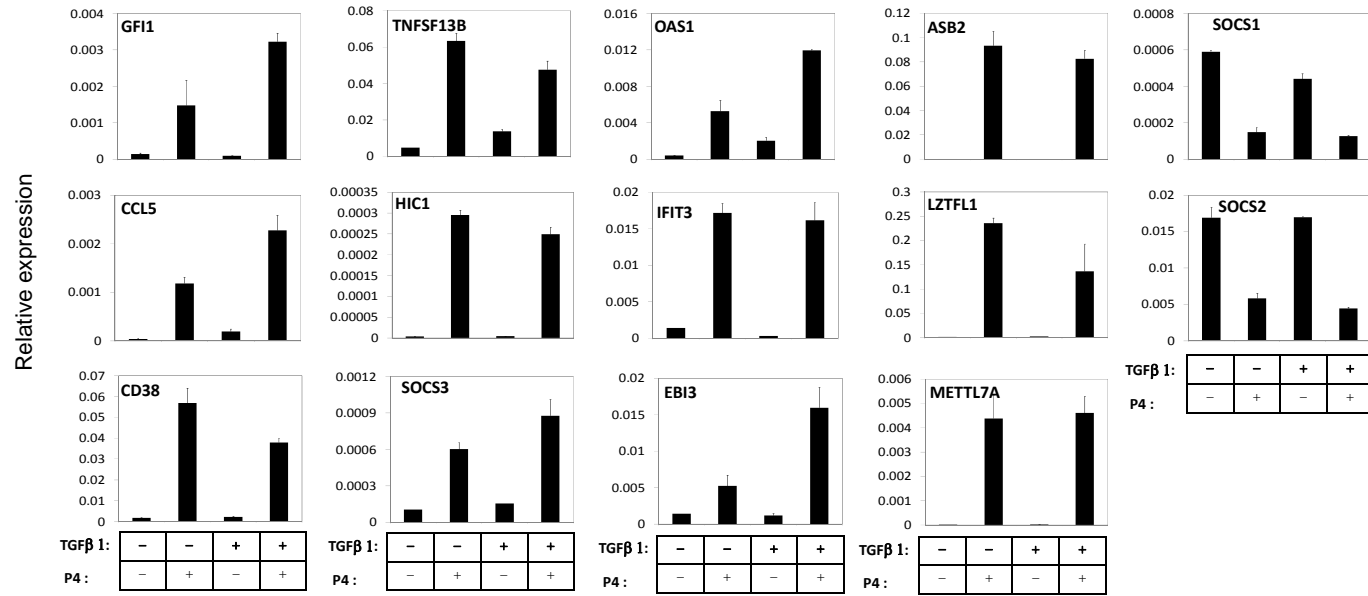

Supplemental Figure 1
